# Supplementary material for: Growth of children in Greenland exceeds the World Health Organization growth charts
Source: PubMed Central journal article supplement — Acta Paediatr. 2018 May 21;107(11):1953–65. doi: 10.1111/apa.14369 (PMC6221127; doi:10.1111/apa.14369), 2018-05-21

## **Growth of children in Greenland exceeds the World Health Organization growth charts**

Kløvgaard M, Odgaard Nielsen N, Lund-Sørensen T, Bjerregaard P, Olsen B, Júlíusson P, Roelants M, Christesen H. – *Acta Paediatrica*, 2018

### **Supplementary tables (pages 2 – 8)**

**Table S1a[b].** Mean (SD) length/height, weight, BMI and head circumference and the corresponding mean (SD) z-scores according to the WHO growth standard (0–5 years) or reference (5–10 years) and the Danish growth references in Greenlandic girls [boys].

**Table S2a[b].** Percentage (95% confidence interval) of girls [boys] above +2 SD according to the WHO and the Danish growth standards/references.

**Table S3a[b].** Percentage (95% confidence interval) of girls [boys] below -2 SD according to the WHO and the Danish growth standards/references.

**Table S4a[b].** Reference data (LMS parameters) and percentiles 3–97 of length/height in Greenlandic girls from 0–8 years [boys from 0–9 years].

**Table S5a[b].** Reference data (LMS parameters) and percentiles 3–97 of weight in Greenlandic girls from 0–8 years [boys from 0–9 years].

**Table S6a[b].** Reference data (LMS parameters) and percentiles 3–97 of the body mass index (BMI) in Greenlandic girls from 0–8 years [boys from 0–9 years].

**Table S7a[b].** Reference data (LMS parameters) and percentiles 3–97 of head circumference in Greenlandic girls [boys] from 0.25–2 years.

### **Supplementary figures (pages 9 – 12)**

**Figure S1** Length, weight and head circumference in girls from birth to 18 months.

**Figure S2** Length/height, weight and BMI in girls from 1.5–8 years.

**Figure S3** Length, weight and head circumference in boys from birth to 18 months.

**Figure S4** Length/height, weight and BMI in boys from 1.5–9 years.

**Table S1a.** Mean (SD) length/height, weight, BMI and head circumference and the corresponding mean (SD) z-scores according to the WHO growth standard (0–5 years) or reference (5–10 years) and the Danish growth references in Greenlandic girls.

| Age (years) | Length/height  |               |                | Weight        |               |               | BMI               |               | Head circumference |               |               |               |
|-------------|----------------|---------------|----------------|---------------|---------------|---------------|-------------------|---------------|--------------------|---------------|---------------|---------------|
|             | cm             | WHO           | DK             | kg            | WHO           | DK            | kg/m <sup>2</sup> | WHO           | DK                 | cm            | WHO           | DK            |
| Birth       | 51.6<br>(2.3)  | 1.3*<br>(1.2) | -0.1<br>(1.1)  | 3.7<br>(0.5)  | 0.8*<br>(1.1) | 0.3*<br>(1.1) | 13.7<br>(1.3)     | 0.2*<br>(1.0) | 0.5*<br>(1.0)      | –             | –             | –             |
| 0–0.25      | 57.4<br>(4.1)  | 0.9*<br>(1.3) | 0.5*<br>(1.2)  | 5.3<br>(1.1)  | 0.8*<br>(1.0) | 0.8*<br>(1.1) | 15.8<br>(1.9)     | 0.4*<br>(1.0) | 0.8*<br>(1.1)      | 38.4<br>(1.7) | 0.8*<br>(1.0) | 0.8*<br>(0.9) |
| 0.25–0.5    | 65.5<br>(3.0)  | 1.1*<br>(1.1) | 0.8*<br>(1.1)  | 7.6<br>(1.1)  | 1.0*<br>(1.0) | 0.9*<br>(1.1) | 17.8<br>(1.9)     | 0.6*<br>(1.2) | 0.7*<br>(1.2)      | 42.3<br>(1.4) | 1.0*<br>(0.9) | 0.6*<br>(0.9) |
| 0.5–1       | 71.2<br>(3.5)  | 1.2*<br>(1.2) | 0.7*<br>(1.1)  | 8.8<br>(1.3)  | 0.8*<br>(1.1) | 0.4*<br>(1.1) | 17.5<br>(1.7)     | 0.4*<br>(1.1) | 0.1<br>(1.1)       | 44.5<br>(1.2) | 1.1*<br>(0.8) | 0.7*<br>(0.8) |
| 1–2         | 77.1<br>(3.0)  | 0.4*<br>(1.0) | 0.0<br>(1.0)   | 10.6<br>(1.4) | 0.9*<br>(1.1) | 0.4*<br>(1.2) | 17.8<br>(1.6)     | 1.0*<br>(1.0) | 0.5*<br>(1.1)      | 46.7<br>(1.1) | 1.0*<br>(0.7) | 0.5*<br>(0.7) |
| 2–5         | 96.8<br>(7.8)  | -0.1<br>(0.9) | -0.3*<br>(1.0) | 16.2<br>(3.5) | 0.7*<br>(1.1) | 0.5*<br>(1.3) | 17.2<br>(2.2)     | 1.1*<br>(1.2) | 1.0*<br>(1.4)      | –             | –             | –             |
| 5–10        | 123.8<br>(7.8) | 0.4*<br>(0.9) | -0.2*<br>(0.9) | 27.4<br>(8.4) | 0.9*<br>(1.1) | 0.5*<br>(1.1) | 17.6<br>(3.5)     | 0.8*<br>(1.1) | 0.8*<br>(1.2)      | –             | –             | –             |

SD: standard deviation; WHO: World Health Organization; DK: Denmark

Age intervals do not include the lowest value

\* p<0.05.

**Table S1b.** Mean (SD) length/height, weight, BMI and head circumference and the corresponding mean (SD) z-scores according to the WHO growth standard (0–5 years) or reference (5–10 years) and the Danish growth references in Greenlandic boys.

| Age (years) | Length/height  |               |                | Weight        |               |               | BMI               |               | Head circumference |               |               |               |
|-------------|----------------|---------------|----------------|---------------|---------------|---------------|-------------------|---------------|--------------------|---------------|---------------|---------------|
|             | cm             | WHO           | DK             | Kg            | WHO           | DK            | kg/m <sup>2</sup> | WHO           | DK                 | cm            | WHO           | DK            |
| Birth       | 52.3<br>(2.1)  | 1.3*<br>(1.1) | -0.1<br>(1.0)  | 3.7<br>(0.6)  | 0.7*<br>(1.1) | 0.9*<br>(1.1) | 13.6<br>(1.3)     | 0.1<br>(1.1)  | 0.4*<br>(1.1)      | –             | –             | –             |
| 0–0.25      | 58.8<br>(4.4)  | 1.0*<br>(1.3) | 0.6*<br>(1.1)  | 5.6<br>(1.3)  | 0.7*<br>(1.0) | 0.8*<br>(1.0) | 16.0<br>(2.0)     | 0.2*<br>(1.1) | 0.7*<br>(1.1)      | 39.0<br>(1.8) | 0.7*<br>(1.0) | 0.8*<br>(1.0) |
| 0.25–0.5    | 67.0<br>(3.2)  | 1.1*<br>(1.3) | 0.8*<br>(1.2)  | 7.9<br>(1.0)  | 0.8*<br>(1.0) | 0.6*<br>(1.0) | 17.6<br>(1.7)     | 0.2*<br>(1.1) | 0.2*<br>(1.1)      | 42.9<br>(1.4) | 0.8*<br>(0.8) | 0.3*<br>(0.7) |
| 0.5–1       | 72.7<br>(3.2)  | 1.1*<br>(1.2) | 0.6*<br>(1.1)  | 9.4<br>(1.1)  | 0.9*<br>(1.0) | 0.3*<br>(0.9) | 17.8<br>(1.6)     | 0.4*<br>(1.1) | 0.1<br>(1.1)       | 45.3<br>(1.3) | 0.8*<br>(1.0) | 0.3*<br>(0.9) |
| 1–2         | 79.1<br>(3.5)  | 0.4*<br>(1.1) | -0.0<br>(1.0)  | 11.3<br>(1.4) | 0.9*<br>(1.0) | 0.3*<br>(1.0) | 17.9<br>(1.6)     | 0.9*<br>(1.1) | 0.4*<br>(1.2)      | 47.4<br>(1.4) | 0.7*<br>(1.0) | -0.0<br>(1.0) |
| 2–5         | 99.8<br>(8.3)  | 0.1<br>(1.0)  | -0.3*<br>(1.0) | 17.0<br>(2.9) | 0.8*<br>(0.8) | 0.5*<br>(0.9) | 16.9<br>(1.2)     | 1.0*<br>(0.9) | 0.9*<br>(1.0)      | –             | –             | –             |
| 5–10        | 124.8<br>(7.5) | 0.5*<br>(0.8) | -0.3*<br>(0.9) | 26.5<br>(4.8) | 0.8*<br>(0.9) | 0.3*<br>(1.0) | 16.9<br>(1.9)     | 0.7*<br>(1.0) | 0.7*<br>(1.1)      | –             | –             | –             |

SD: standard deviation; WHO: World Health Organization; DK: Denmark

Age intervals do not include the lowest value

\* p<0.05.

**Table S2a.** Percentage (95% confidence interval) of girls above +2 SD according to the WHO and the Danish growth standards/references.

| Age<br>(years) | Length/height       |                    | Weight              |                     | BMI                 |                     | Head circumference |                   |
|----------------|---------------------|--------------------|---------------------|---------------------|---------------------|---------------------|--------------------|-------------------|
|                | WHO                 | DK                 | WHO                 | DK                  | WHO                 | DK                  | WHO                | DK                |
| Birth          | 30.0<br>(22.2–39.1) | 2.5<br>(0.6–7.7)   | 11.5<br>(6.6–18.8)  | 8.2<br>(4.2–14.9)   | 2.5<br>(0.6–7.7)    | 7.5<br>(3.7–14.2)   | –                  | –                 |
| 0–0.25         | 19.8<br>(14.1–26.9) | 10.5<br>(6.4–16.5) | 9.2<br>(5.6–14.5)   | 10.3<br>(6.5–15.8)  | 4.9<br>(2.3–9.8)    | 14.2<br>(9.4–20.8)  | 7.6<br>(3.8–4.4)   | 4.2<br>(1.6–10.1) |
| 0.25–0.5       | 23.6<br>(17.2–31.5) | 14.2<br>(9.2–21.1) | 18.5<br>(13.0–25.5) | 16.7<br>(11.5–23.5) | 13.5<br>(8.6–20.3)  | 12.8<br>(8.1–19.6)  | 11.9<br>(6.9–19.4) | 3.4<br>(1.1–9.0)  |
| 0.5–1          | 26.7<br>(18.0–37.6) | 11.6<br>(6.0–20.8) | 10.2<br>(5.3–18.4)  | 6.1<br>(2.5–13.4)   | 7.0<br>(2.9–15.1)   | 5.8<br>(2.2–13.7)   | 6.5<br>(2.1–16.5)  | 3.2<br>(0.6–12.2) |
| 1–2            | 7.3<br>(3.2–14.9)   | 4.2<br>(1.3–10.9)  | 12.0<br>(6.6–20.4)  | 6.0<br>(2.5–13.1)   | 15.8<br>(9.4–25.0)  | 9.5<br>(4.7–17.7)   | 6.2<br>(2.0–16.0)  | 3.1<br>(0.5–11.8) |
| 2–5            | 1.1<br>(0.1–6.8)    | 1.1<br>(0.1–6.8)   | 12.9<br>(7.1–21.8)  | 12.9<br>(7.1–21.8)  | 18.7<br>(11.6–28.5) | 19.8<br>(12.4–29.7) | –                  | –                 |
| 5–10           | 2.1<br>(0.7–5.5)    | 0.5<br>(0.0–3.3)   | 10.4<br>(6.7–15.7)  | 9.4<br>(5.9–14.5)   | 10.4<br>(6.6–15.8)  | 10.9<br>(7.0–16.4)  | –                  | –                 |

WHO: World Health Organization; DK: Denmark

Age intervals do not include the lowest value

**Table S2b.** Percentage (95% confidence interval) of boys above +2 SD according to the WHO and the Danish growth standards/references.

| Age<br>(years) | Length/height       |                    | Weight             |                    | BMI                |                    | Head circumference |                    |
|----------------|---------------------|--------------------|--------------------|--------------------|--------------------|--------------------|--------------------|--------------------|
|                | WHO                 | DK                 | WHO                | DK                 | WHO                | DK                 | WHO                | DK                 |
| Birth          | 26.4<br>(19.5–34.7) | 2.8<br>(0.9–7.6)   | 9.3<br>(5.2–15.7)  | 14.1<br>(9.0–21.2) | 2.1<br>(0.6–6.6)   | 4.3<br>(1.7–9.4)   | –                  | –                  |
| 0–0.25         | 22.2<br>(16.6–29)   | 9.0<br>(5.5–14.2)  | 9.1<br>(5.8–13.9)  | 12.3<br>(8.4–17.5) | 3.2<br>(1.3–7.2)   | 7.5<br>(4.3–12.5)  | 10.0<br>(5.9–16.2) | 10.0<br>(5.9–16.2) |
| 0.25–0.5       | 27.6<br>(21.0–35.2) | 14.7<br>(9.8–21.3) | 13.7<br>(9.3–19.8) | 7.7<br>(4.4–12.8)  | 7.4<br>(4.0–12.8)  | 6.7<br>(3.6–12.1)  | 6.0<br>(2.8–11.8)  | 1.5<br>(0.3–5.8)   |
| 0.5–1          | 17.6<br>(11.1–26.7) | 8.8<br>(4.4–16.5)  | 13.2<br>(8.0–20.9) | 1.7<br>(0.3–6.4)   | 4.0<br>(1.3–10.4)  | 3.0<br>(0.8–9.1)   | 15.2<br>(8.4–25.4) | 2.5<br>(0.4–9.7)   |
| 1–2            | 8.8<br>(4.1–17.1)   | 1.1<br>(0.1–6.8)   | 12.6<br>(7.0–21.4) | 1.1<br>(0.1–6.6)   | 16.5<br>(9.8–26.1) | 7.7<br>(3.4–15.7)  | 8.8<br>(3.3–20.0)  | 5.3<br>(1.4–5.5)   |
| 2–5            | 1.1<br>(0.1–6.8)    | 1.1<br>(0.1–6.8)   | 4.2<br>(1.3–10.9)  | 4.2<br>(1.3–10.9)  | 13.3<br>(7.4–22.5) | 14.4<br>(8.2–23.8) | –                  | –                  |
| 5–10           | 5.2<br>(2.7–9.3)    | 0.5<br>(0.0–3.0)   | 9.7<br>(6.2–14.6)  | 6.5<br>(3.7–10.8)  | 14.2<br>(9.9–19.7) | 13.7<br>(9.5–19.2) | –                  | –                  |

WHO: World Health Organization; DK: Denmark

Age intervals do not include the lowest value

**Table S3a.** Percentage (95% confidence interval) of girls below -2 SD according to the WHO and the Danish growth standards/references.

| Age<br>(years) | Length/height    |                   | Weight           |                   | BMI              |                   | Head circumference |                  |
|----------------|------------------|-------------------|------------------|-------------------|------------------|-------------------|--------------------|------------------|
|                | WHO              | DK                | WHO              | DK                | WHO              | DK                | WHO                | DK               |
| Birth          | 0.8<br>(0–5.2)   | 5.0<br>(2.0–11.0) | 0.8<br>(0.0–5.2) | 0.8<br>(0.0–5.2)  | 1.7<br>(0.3–6.5) | 0.8<br>(0.0–5.2)  | –                  | –                |
| 0–0.25         | 2.5<br>(0.8–6.6) | 3.1<br>(1.1–7.4)  | 1.6<br>(0.4–5.0) | 1.1<br>(0.2–4.3)  | 2.5<br>(0.8–6.6) | 1.9<br>(0.5–5.7)  | 1.7<br>(0.3–6.6)   | 0.8<br>(0.0–5.3) |
| 0.25–0.5       | 0.0<br>(0.0–3.2) | 1.4<br>(0.2–5.3)  | 0.0<br>(0.0–2.9) | 0.6<br>(0.0–3.9)  | 1.4<br>(0.2–5.3) | 2.0<br>(0.5–6.3)  | 0.8<br>(0.0–5.3)   | 0.8<br>(0.0–5.3) |
| 0.5–1          | 0.0<br>(0.0–5.3) | 0.0<br>(0.0–5.3)  | 0.0<br>(0.0–4.7) | 2.0<br>(0.4–7.9)  | 0.0<br>(0.0–5.3) | 4.7<br>(1.5–12.1) | 0.0<br>(0.0–7.3)   | 0.0<br>(0.0–7.3) |
| 1–2            | 0.0<br>(0.0–4.8) | 1.0<br>(0.1–6.5)  | 0.0<br>(0.0–4.6) | 5.0<br>(1.9–11.8) | 0.0<br>(0.0–4.8) | 4.2<br>(1.4–11)   | 0.0<br>(0.0–7.1)   | 0.0<br>(0.0–7.1) |
| 2–5            | 0.0<br>(0.0–5.0) | 1.1<br>(0.1–6.8)  | 1.1<br>(0.1–6.7) | 1.1<br>(0.1–6.7)  | 0.0<br>(0.0–5.0) | 1.1<br>(0.1–6.8)  | –                  | –                |
| 5–10           | 0.0<br>(0.0–2.4) | 2.6<br>(1.0–6.2)  | 0.0<br>(0.0–2.3) | 0.0<br>(0.0–2.3)  | 0.0<br>(0.0–2.4) | 0.0<br>(0.0–2.4)  | –                  | –                |

WHO: World Health Organization; DK: Denmark  
Age intervals do not include the lowest value

**Table S3b.** Percentage (95% confidence interval) of boys below -2 SD according to the WHO and the Danish growth standards/references.

| Age<br>(years) | Length/height    |                   | Weight           |                  | BMI              |                   | Head circumference |                   |
|----------------|------------------|-------------------|------------------|------------------|------------------|-------------------|--------------------|-------------------|
|                | WHO              | DK                | WHO              | DK               | WHO              | DK                | WHO                | DK                |
| Birth          | 0.7<br>(0.0–4.5) | 2.8<br>(0.9–7.6)  | 1.4<br>(0.2–5.6) | 1.4<br>(0.2–5.5) | 3.6<br>(1.3–8.6) | 2.1<br>(0.6–6.6)  | –                  | –                 |
| 0–0.25         | 1.1<br>(0.2–4.2) | 1.6<br>(0.4–4.9)  | 1.4<br>(0.4–4.3) | 0.9<br>(0.2–3.6) | 2.7<br>(1.0–6.5) | 1.6<br>(0.4–5.0)  | 1.3<br>(0.2–5.2)   | 1.3<br>(0.2–5.2)  |
| 0.25–0.5       | 1.2<br>(0.2–4.8) | 1.2<br>(0.2–4.8)  | 0.0<br>(0.0–2.6) | 0.0<br>(0.0–2.6) | 0.6<br>(0.0–3.9) | 0.6<br>(0.0–3.9)  | 0.0<br>(0.0–3.5)   | 0.0<br>(0.0–3.5)  |
| 0.5–1          | 1.0<br>(0.1–6.1) | 1.0<br>(0.1–6.1)  | 0.0<br>(0.0–3.8) | 0.8<br>(0.0–5.2) | 2.0<br>(0.3–7.7) | 4.0<br>(1.3–10.4) | 0.0<br>(0.0–5.8)   | 0.0<br>(0.0–5.8)  |
| 1–2            | 0.0<br>(0.0–5.0) | 0.0<br>(0.0–5.0)  | 0.0<br>(0.0–4.8) | 1.1<br>(0.1–6.6) | 0.0<br>(0.0–5.0) | 1.1<br>(0.1–6.8)  | 0.0<br>(0.0–7.9)   | 1.8<br>(0.1–10.6) |
| 2–5            | 1.1<br>(0.1–6.8) | 6.5<br>(2.7–14.2) | 0.0<br>(0.0–4.8) | 0.0<br>(0.0–4.8) | 0.0<br>(0.0–5.1) | 1.1<br>(0.1–6.9)  | –                  | –                 |
| 5–10           | 0.0<br>(0.0–2.2) | 1.4<br>(0.4–4.4)  | 0.0<br>(0.0–2.2) | 0.9<br>(0.2–3.6) | 0.0<br>(0.0–2.2) | 0.5<br>(0.0–3.0)  | –                  | –                 |

WHO: World Health Organization; DK: Denmark  
Age intervals do not include the lowest value

**Table S4a:** Reference data (LMS parameters) and percentiles 3–97 of length/height in Greenlandic girls from 0–8 years.

| Age  | L | M     | S       | P3    | P10   | P25   | P50   | P75   | P90   | P97   |
|------|---|-------|---------|-------|-------|-------|-------|-------|-------|-------|
| 0    | 1 | 52.0  | 0.04340 | 47.7  | 49.1  | 50.4  | 52.0  | 53.5  | 54.8  | 56.2  |
| 0.25 | 1 | 61.6  | 0.04132 | 56.8  | 58.3  | 59.8  | 61.6  | 63.3  | 64.8  | 66.3  |
| 0.5  | 1 | 68.3  | 0.03962 | 63.2  | 64.8  | 66.4  | 68.3  | 70.1  | 71.7  | 73.4  |
| 0.75 | 1 | 72.7  | 0.03844 | 67.4  | 69.1  | 70.8  | 72.7  | 74.6  | 76.3  | 77.9  |
| 1    | 1 | 76.0  | 0.03766 | 70.6  | 72.3  | 74.0  | 76.0  | 77.9  | 79.6  | 81.4  |
| 1.5  | 1 | 81.4  | 0.03681 | 75.7  | 77.5  | 79.4  | 81.4  | 83.4  | 85.2  | 87.0  |
| 2    | 1 | 86.1  | 0.03640 | 80.2  | 82.0  | 83.9  | 86.1  | 88.2  | 90.1  | 91.9  |
| 3    | 1 | 94.3  | 0.03604 | 87.9  | 89.9  | 92.0  | 94.3  | 96.5  | 98.6  | 100.6 |
| 4    | 1 | 101.6 | 0.03594 | 94.7  | 96.9  | 99.1  | 101.6 | 104.1 | 106.3 | 108.5 |
| 5    | 1 | 109.1 | 0.03604 | 101.7 | 104.1 | 106.4 | 109.1 | 111.8 | 114.1 | 116.5 |
| 6    | 1 | 116.5 | 0.03627 | 108.6 | 111.1 | 113.7 | 116.5 | 119.4 | 121.9 | 124.5 |
| 7    | 1 | 123.3 | 0.03659 | 114.8 | 117.5 | 120.2 | 123.3 | 126.3 | 129.1 | 131.8 |
| 8    | 1 | 129.4 | 0.03694 | 120.4 | 123.3 | 126.2 | 129.4 | 132.6 | 135.5 | 138.4 |

**Table S4b:** Reference data (LMS parameters) and percentiles 3–97 of length/height in Greenlandic boys from 0–9 years.

| Age  | L | M     | S       | P3    | P10   | P25   | P50   | P75   | P90   | P97   |
|------|---|-------|---------|-------|-------|-------|-------|-------|-------|-------|
| 0    | 1 | 53.3  | 0.04420 | 48.8  | 50.2  | 51.7  | 53.3  | 54.8  | 56.3  | 57.7  |
| 0.25 | 1 | 62.5  | 0.04266 | 57.5  | 59.1  | 60.7  | 62.5  | 64.3  | 65.9  | 67.5  |
| 0.5  | 1 | 69.5  | 0.04125 | 64.1  | 65.8  | 67.5  | 69.5  | 71.4  | 73.1  | 74.9  |
| 0.75 | 1 | 74.3  | 0.04012 | 68.7  | 70.5  | 72.3  | 74.3  | 76.3  | 78.1  | 79.9  |
| 1    | 1 | 77.9  | 0.03926 | 72.1  | 74.0  | 75.8  | 77.9  | 80.0  | 81.8  | 83.7  |
| 1.5  | 1 | 83.7  | 0.03819 | 77.7  | 79.6  | 81.5  | 83.7  | 85.8  | 87.8  | 89.7  |
| 2    | 1 | 88.5  | 0.03758 | 82.3  | 84.3  | 86.3  | 88.5  | 90.8  | 92.8  | 94.8  |
| 3    | 1 | 96.6  | 0.03683 | 89.9  | 92.1  | 94.2  | 96.6  | 99.0  | 101.2 | 103.3 |
| 4    | 1 | 103.8 | 0.03627 | 96.7  | 99.0  | 101.2 | 103.8 | 106.3 | 108.6 | 110.9 |
| 5    | 1 | 110.9 | 0.03576 | 103.5 | 105.9 | 108.3 | 110.9 | 113.6 | 116.0 | 118.4 |
| 6    | 1 | 118.0 | 0.03521 | 110.2 | 112.7 | 115.2 | 118.0 | 120.8 | 123.3 | 125.8 |
| 7    | 1 | 124.3 | 0.03462 | 116.2 | 118.8 | 121.4 | 124.3 | 127.2 | 129.8 | 132.4 |
| 8    | 1 | 130.0 | 0.03398 | 121.6 | 124.3 | 127.0 | 130.0 | 132.9 | 135.6 | 138.3 |
| 9    | 1 | 135.5 | 0.03331 | 127.0 | 129.8 | 132.5 | 135.5 | 138.6 | 141.3 | 144.0 |

**Table S5a:** Reference data (LMS parameters) and percentiles 3–97 of weight in Greenlandic girls from 0–8 years.

| Age  | L     | M    | S       | P3   | P10  | P25  | P50  | P75  | P90  | P97  |
|------|-------|------|---------|------|------|------|------|------|------|------|
| 0    | 1.20  | 3.7  | 0.13445 | 2.7  | 3.0  | 3.4  | 3.7  | 4.0  | 4.3  | 4.6  |
| 0.25 | 0.90  | 6.5  | 0.13286 | 4.9  | 5.4  | 5.9  | 6.5  | 7.1  | 7.6  | 8.2  |
| 0.5  | 0.66  | 8.3  | 0.13231 | 6.3  | 6.9  | 7.5  | 8.3  | 9.0  | 9.7  | 10.4 |
| 0.75 | 0.47  | 9.4  | 0.13246 | 7.2  | 7.9  | 8.6  | 9.4  | 10.2 | 11.0 | 11.9 |
| 1    | 0.33  | 10.2 | 0.13288 | 7.9  | 8.6  | 9.3  | 10.2 | 11.2 | 12.1 | 13.0 |
| 1.5  | 0.10  | 11.5 | 0.13394 | 8.9  | 9.7  | 10.5 | 11.5 | 12.6 | 13.7 | 14.8 |
| 2    | -0.10 | 12.7 | 0.13508 | 9.9  | 10.7 | 11.6 | 12.7 | 13.9 | 15.2 | 16.5 |
| 3    | -0.48 | 15.0 | 0.13761 | 11.7 | 12.6 | 13.7 | 15.0 | 16.5 | 18.0 | 19.7 |
| 4    | -0.83 | 17.2 | 0.14036 | 13.5 | 14.5 | 15.7 | 17.2 | 18.9 | 20.9 | 23.1 |
| 5    | -1.20 | 19.6 | 0.14368 | 15.5 | 16.6 | 17.9 | 19.6 | 21.7 | 24.1 | 27.2 |
| 6    | -1.57 | 22.3 | 0.14786 | 17.7 | 18.9 | 20.3 | 22.3 | 24.8 | 27.9 | 32.1 |
| 7    | -1.94 | 25.2 | 0.15378 | 20.1 | 21.4 | 23.0 | 25.2 | 28.3 | 32.4 | 38.6 |
| 8    | -2.32 | 28.6 | 0.16145 | 22.7 | 24.1 | 25.9 | 28.6 | 32.4 | 37.9 | 48.3 |

**Table S5b:** Reference data (LMS parameters) and percentiles 3–97 of weight in Greenlandic boys from 0–9 years.

| Age  | L     | M    | S       | P3   | P10  | P25  | P50  | P75  | P90  | P97  |
|------|-------|------|---------|------|------|------|------|------|------|------|
| 0    | 1.31  | 3.8  | 0.13083 | 2.8  | 3.1  | 3.4  | 3.8  | 4.1  | 4.4  | 4.7  |
| 0.25 | 1.01  | 6.9  | 0.12142 | 5.3  | 5.8  | 6.3  | 6.9  | 7.5  | 8.0  | 8.5  |
| 0.5  | 0.79  | 8.7  | 0.11499 | 6.9  | 7.5  | 8.1  | 8.7  | 9.4  | 10.0 | 10.7 |
| 0.75 | 0.64  | 9.9  | 0.11136 | 7.9  | 8.5  | 9.2  | 9.9  | 10.6 | 11.3 | 12.0 |
| 1    | 0.53  | 10.8 | 0.10933 | 8.7  | 9.3  | 10.0 | 10.8 | 11.6 | 12.3 | 13.1 |
| 1.5  | 0.34  | 12.2 | 0.10743 | 9.9  | 10.6 | 11.3 | 12.2 | 13.1 | 14.0 | 14.8 |
| 2    | 0.19  | 13.4 | 0.10681 | 10.9 | 11.6 | 12.4 | 13.4 | 14.3 | 15.3 | 16.3 |
| 3    | -0.09 | 15.6 | 0.10727 | 12.7 | 13.6 | 14.5 | 15.6 | 16.7 | 17.9 | 19.1 |
| 4    | -0.38 | 17.9 | 0.10970 | 14.7 | 15.6 | 16.7 | 17.9 | 19.3 | 20.7 | 22.2 |
| 5    | -0.69 | 20.5 | 0.11410 | 16.8 | 17.8 | 19.0 | 20.5 | 22.2 | 23.9 | 25.9 |
| 6    | -0.97 | 23.0 | 0.11975 | 18.8 | 20.0 | 21.3 | 23.0 | 25.1 | 27.2 | 29.7 |
| 7    | -1.19 | 25.5 | 0.12591 | 20.7 | 22.0 | 23.5 | 25.5 | 27.9 | 30.5 | 33.7 |
| 8    | -1.38 | 28.1 | 0.13261 | 22.7 | 24.1 | 25.8 | 28.1 | 30.9 | 34.1 | 38.1 |
| 9    | -1.58 | 30.9 | 0.13967 | 24.8 | 26.4 | 28.3 | 30.9 | 34.2 | 38.1 | 43.3 |

**Table S6a:** Reference data (LMS parameters) and percentiles 3–97 of the body mass index (BMI) in Greenlandic girls from 0–8 years.

| Age  | L     | M    | S       | P3   | P10  | P25  | P50  | P75  | P90  | P97  |
|------|-------|------|---------|------|------|------|------|------|------|------|
| 0    | 1.13  | 13.7 | 0.09360 | 11.2 | 12.0 | 12.8 | 13.7 | 14.5 | 15.3 | 16.0 |
| 0.25 | 0.88  | 17.2 | 0.09950 | 14.0 | 15.0 | 16.0 | 17.2 | 18.3 | 19.4 | 20.4 |
| 0.5  | 0.68  | 17.8 | 0.09994 | 14.6 | 15.6 | 16.6 | 17.8 | 19.0 | 20.1 | 21.3 |
| 0.75 | 0.48  | 17.7 | 0.09821 | 14.6 | 15.6 | 16.6 | 17.7 | 18.9 | 20.0 | 21.2 |
| 1    | 0.28  | 17.7 | 0.09719 | 14.6 | 15.6 | 16.5 | 17.7 | 18.9 | 20.0 | 21.1 |
| 1.5  | -0.12 | 17.4 | 0.09774 | 14.5 | 15.4 | 16.3 | 17.4 | 18.6 | 19.8 | 21.0 |
| 2    | -0.49 | 17.2 | 0.09946 | 14.4 | 15.2 | 16.1 | 17.2 | 18.5 | 19.7 | 21.0 |
| 3    | -1.13 | 16.9 | 0.10318 | 14.2 | 15.0 | 15.8 | 16.9 | 18.2 | 19.5 | 21.1 |
| 4    | -1.65 | 16.7 | 0.10651 | 14.0 | 14.7 | 15.6 | 16.7 | 18.0 | 19.5 | 21.3 |
| 5    | -2.07 | 16.6 | 0.10948 | 14.0 | 14.7 | 15.5 | 16.6 | 18.0 | 19.6 | 21.7 |
| 6    | -2.43 | 16.6 | 0.11223 | 14.0 | 14.7 | 15.5 | 16.6 | 18.1 | 19.9 | 22.4 |
| 7    | -2.74 | 16.8 | 0.11490 | 14.2 | 14.8 | 15.7 | 16.8 | 18.3 | 20.3 | 23.3 |
| 8    | -3.01 | 17.0 | 0.11739 | 14.4 | 15.1 | 15.9 | 17.0 | 18.7 | 20.8 | 24.5 |

**Table S6b:** Reference data (LMS parameters) and percentiles 3–97 of the body mass index (BMI) in Greenlandic boys from 0–9 years.

| Age  | L     | M    | S       | P3   | P10  | P25  | P50  | P75  | P90  | P97  |
|------|-------|------|---------|------|------|------|------|------|------|------|
| 0    | 1.70  | 13.7 | 0.09575 | 11.1 | 11.9 | 12.8 | 13.7 | 14.6 | 15.3 | 16.0 |
| 0.25 | 0.53  | 17.1 | 0.09192 | 14.2 | 15.1 | 16.0 | 17.1 | 18.1 | 19.1 | 20.1 |
| 0.5  | 0.06  | 17.8 | 0.09102 | 15.0 | 15.8 | 16.7 | 17.8 | 18.9 | 20.0 | 21.1 |
| 0.75 | -0.15 | 17.8 | 0.09007 | 15.1 | 15.9 | 16.8 | 17.8 | 19.0 | 20.0 | 21.2 |
| 1    | -0.29 | 17.8 | 0.08895 | 15.1 | 15.9 | 16.7 | 17.8 | 18.9 | 20.0 | 21.1 |
| 1.5  | -0.51 | 17.5 | 0.08674 | 15.0 | 15.7 | 16.5 | 17.5 | 18.6 | 19.6 | 20.8 |
| 2    | -0.70 | 17.3 | 0.08517 | 14.8 | 15.5 | 16.3 | 17.3 | 18.3 | 19.3 | 20.5 |
| 3    | -1.06 | 16.9 | 0.08445 | 14.6 | 15.3 | 16.0 | 16.9 | 17.9 | 19.0 | 20.1 |
| 4    | -1.37 | 16.7 | 0.08616 | 14.4 | 15.1 | 15.8 | 16.7 | 17.8 | 18.8 | 20.1 |
| 5    | -1.65 | 16.6 | 0.08923 | 14.3 | 15.0 | 15.7 | 16.6 | 17.7 | 18.9 | 20.2 |
| 6    | -1.88 | 16.6 | 0.09272 | 14.2 | 14.9 | 15.6 | 16.6 | 17.7 | 18.9 | 20.5 |
| 7    | -2.08 | 16.5 | 0.09616 | 14.2 | 14.8 | 15.6 | 16.5 | 17.7 | 19.1 | 20.7 |
| 8    | -2.25 | 16.5 | 0.09932 | 14.2 | 14.8 | 15.5 | 16.5 | 17.8 | 19.2 | 21.1 |
| 9    | -2.40 | 16.6 | 0.10217 | 14.1 | 14.8 | 15.5 | 16.6 | 17.9 | 19.4 | 21.4 |

**Table S7a:** Reference data (LMS parameters) and percentiles 3–97 of head circumference in Greenlandic girls from 0.25–2 years.

| Age  | L | M    | S       | P3   | P10  | P25  | P50  | P75  | P90  | P97  |
|------|---|------|---------|------|------|------|------|------|------|------|
| 0.25 | 1 | 40.6 | 0.28890 | 38.4 | 39.1 | 39.9 | 40.6 | 41.4 | 42.2 | 42.9 |
| 0.5  | 1 | 43.5 | 0.02561 | 41.4 | 42.1 | 42.7 | 43.5 | 44.2 | 44.9 | 45.6 |
| 0.75 | 1 | 45.2 | 0.02335 | 43.2 | 43.8 | 44.5 | 45.2 | 45.9 | 46.5 | 47.2 |
| 1    | 1 | 46.3 | 0.02191 | 44.4 | 45.0 | 45.6 | 46.3 | 47.0 | 47.6 | 48.3 |
| 1.5  | 1 | 47.8 | 0.02004 | 46.0 | 46.5 | 47.1 | 47.8 | 48.4 | 49.0 | 49.6 |
| 2    | 1 | 48.8 | 0.01870 | 47.0 | 47.6 | 48.1 | 48.8 | 49.4 | 49.9 | 50.5 |

**Table S7b:** Reference data (LMS parameters) and percentiles 3–97 of head circumference in Greenlandic boys from 0.25–2 years.

| Age  | L | M    | S       | P3   | P10  | P25  | P50  | P75  | P90  | P97  |
|------|---|------|---------|------|------|------|------|------|------|------|
| 0.25 | 1 | 41.4 | 0.02652 | 39.4 | 40.0 | 40.7 | 41.4 | 42.2 | 42.8 | 43.5 |
| 0.5  | 1 | 44.3 | 0.02532 | 42.2 | 42.8 | 43.5 | 44.3 | 45.0 | 45.7 | 46.4 |
| 0.75 | 1 | 45.9 | 0.02528 | 43.7 | 44.4 | 45.1 | 45.9 | 46.7 | 47.4 | 48.1 |
| 1    | 1 | 46.9 | 0.02504 | 44.7 | 45.4 | 46.1 | 46.9 | 47.7 | 48.4 | 49.1 |
| 1.5  | 1 | 48.3 | 0.02365 | 46.2 | 46.9 | 47.5 | 48.3 | 49.1 | 49.8 | 50.5 |
| 2    | 1 | 49.3 | 0.02209 | 47.2 | 47.9 | 48.5 | 49.3 | 50.0 | 50.7 | 51.3 |

**Following pages:** Figures S1–S4, growth reference charts (print layout)





Ateq / Navn / Name

Inuuk / Fødselsdato / Date of birth

### Alliartornerup naleqqussarnerani (1.5 – 8 ukiut) Vækstkurve / growth chart (1.5 – 8 år/years)

### Niviarsiaqqat Piger / Girls

| Utoqqaassuseq<br>alder – age | Angissuseq<br>længde – length | Oqimaassuseq<br>vægt – weight | BMI<br>Body Mass Index |
|------------------------------|-------------------------------|-------------------------------|------------------------|
|                              |                               |                               |                        |
|                              |                               |                               |                        |
|                              |                               |                               |                        |
|                              |                               |                               |                        |
|                              |                               |                               |                        |
|                              |                               |                               |                        |
|                              |                               |                               |                        |
|                              |                               |                               |                        |

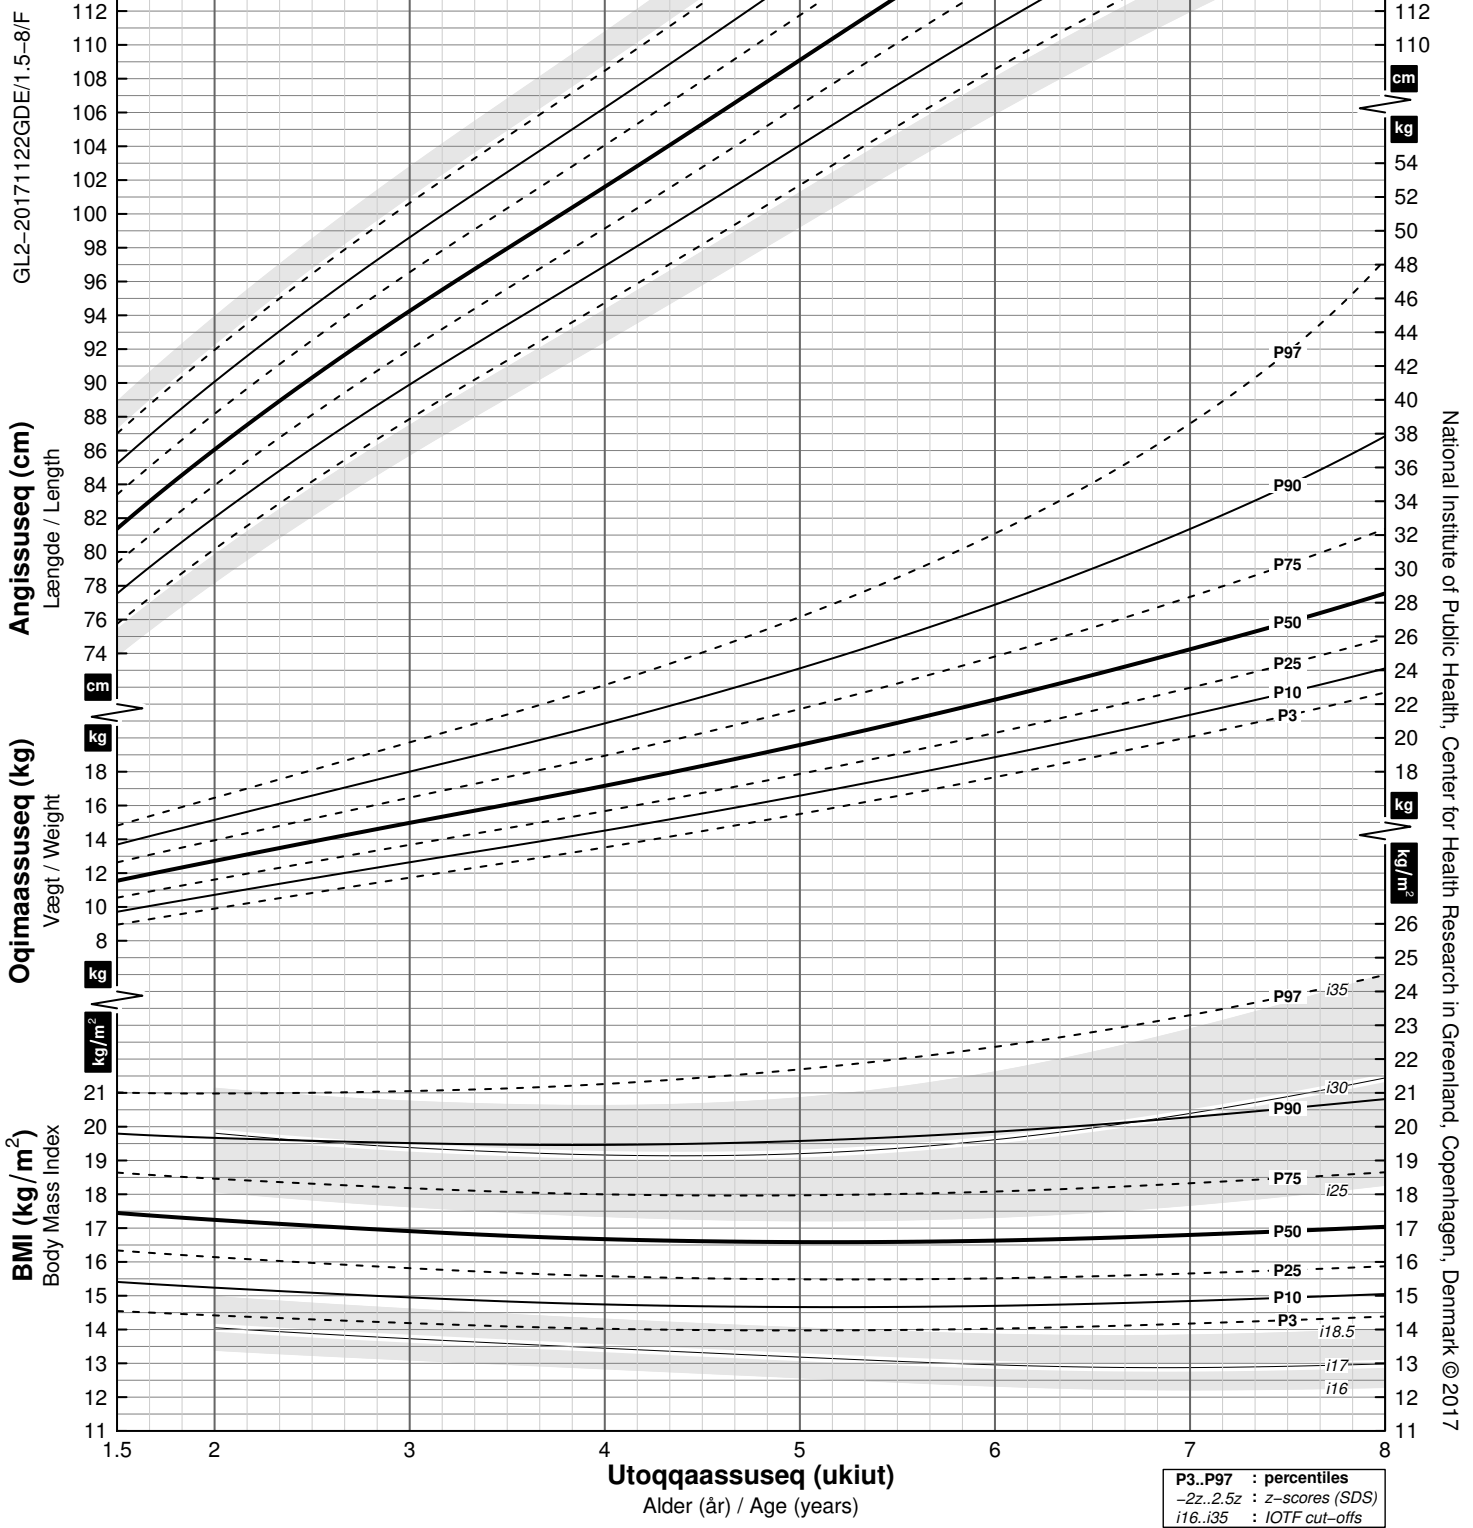

National Institute of Public Health, Center for Health Research in Greenland, Copenhagen, Denmark © 2017



Ateq / Navn / Name

Inuuk / Fødselsdato / Date of birth

**Alliartornerup naleqqussarnerani (1.5 – 9 ukiut)**  
 Vækstkurve / growth chart (1.5 – 9 år/years)

**Nukappiaraq**  
 Dreng / Boys

| Utoqqaassuseq<br>alder – age | Angissuseq<br>længde – length | Oqimaassuseq<br>vægt – weight | BMI<br>Body Mass Index |
|------------------------------|-------------------------------|-------------------------------|------------------------|
|                              |                               |                               |                        |
|                              |                               |                               |                        |
|                              |                               |                               |                        |
|                              |                               |                               |                        |
|                              |                               |                               |                        |
|                              |                               |                               |                        |
|                              |                               |                               |                        |
|                              |                               |                               |                        |

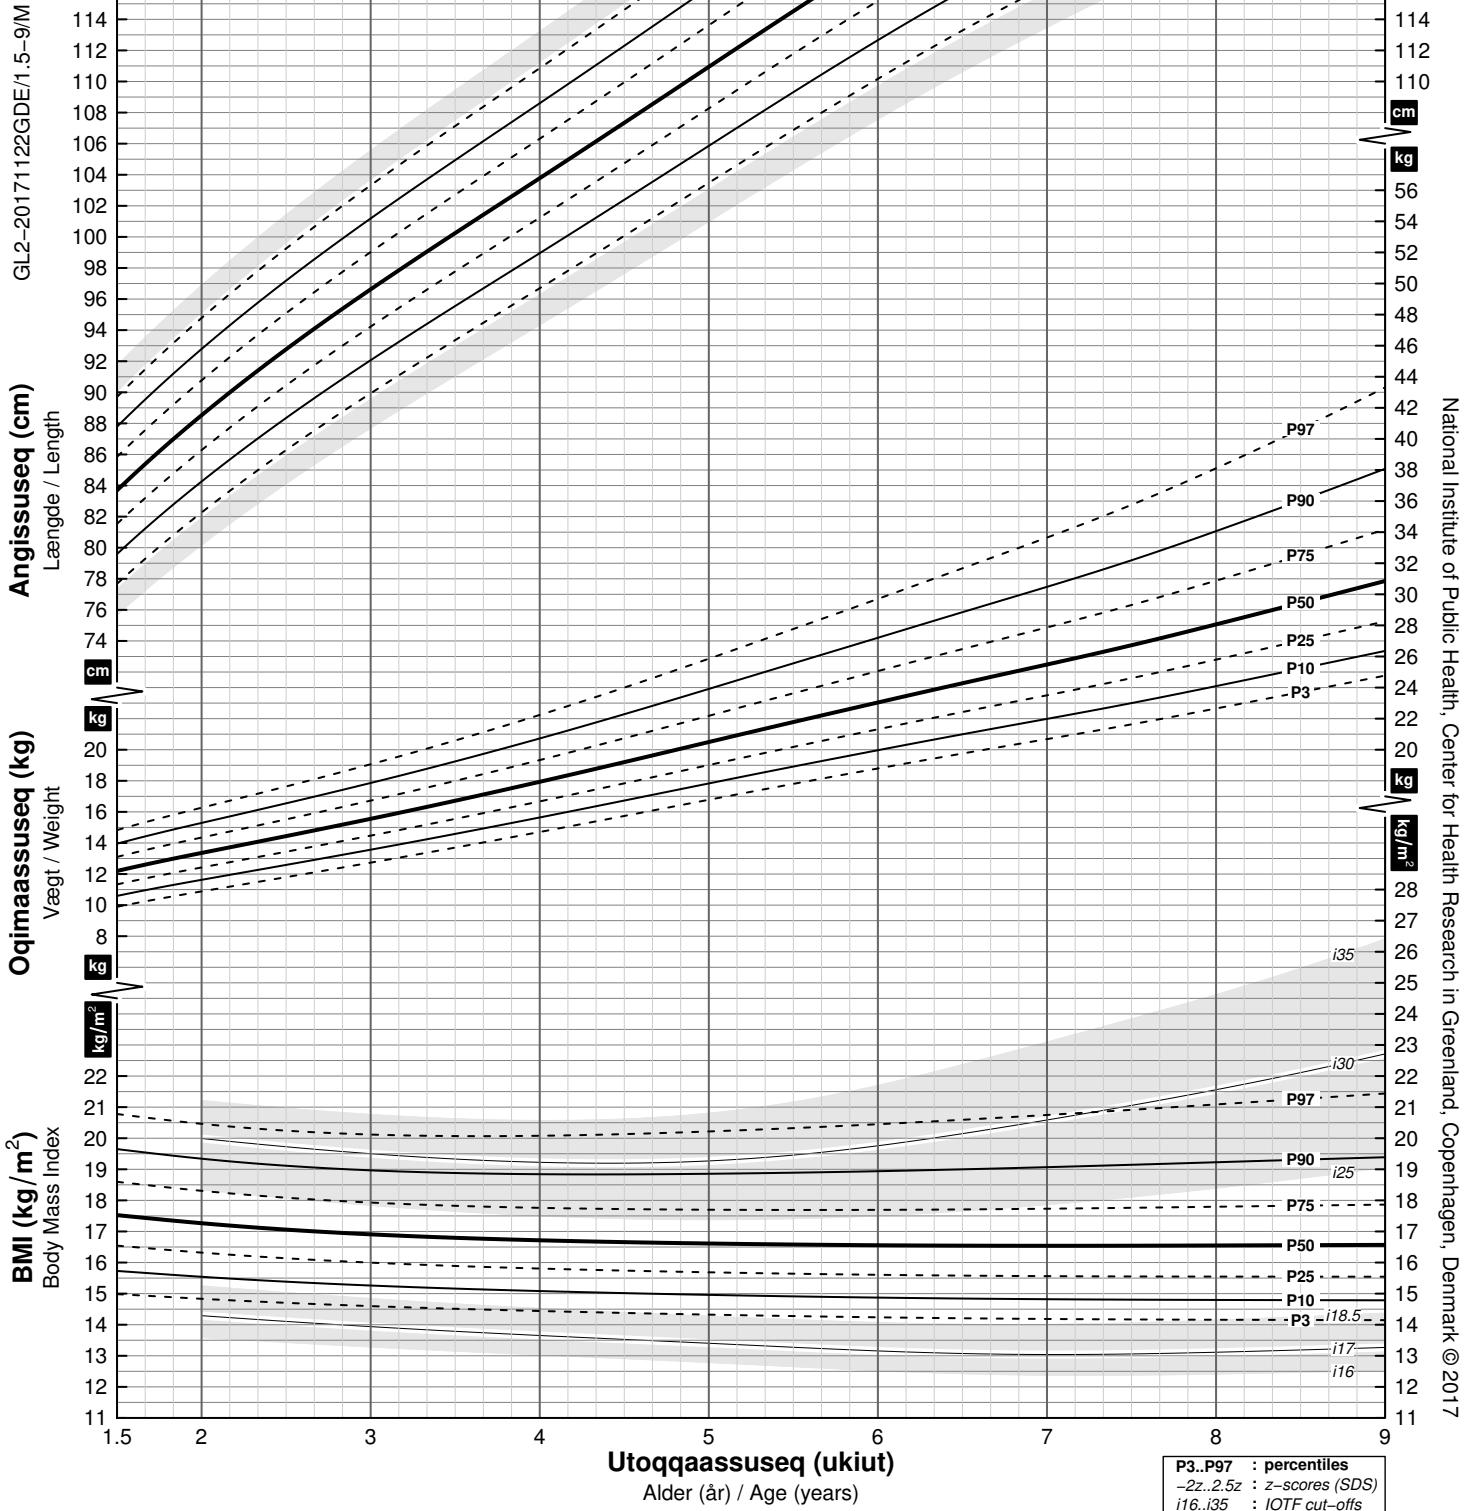

Supplement: APA-107-1953-s001.pdf [file APA-107-1953-s001.pdf]
